# Supplementary material for: Stimulation of tumoricidal immunity via bacteriotherapy inhibits glioblastoma relapse
Source: PubMed Central journal article supplement (PMC11102507; doi:10.1038/s41467-024-48606-5), 2024-05-18
Supplement: 41467_2024_48606_MOESM1_ESM.pdf [file 41467_2024_48606_MOESM1_ESM.pdf]

Supplementary Information:

## **Stimulation of Tumoricidal Immunity via Bacteriotherapy Inhibits Glioblastoma Relapse**

Yulin Zhang<sup>1,2,3,10</sup>, Kaiyan Xi<sup>1,2,4,10</sup>, Zhipeng Fu<sup>3,10</sup>, Yuying Zhang<sup>5</sup>, Bo Cheng<sup>6</sup>, Fan Feng<sup>1,2</sup>, Yuanmin Dong<sup>3</sup>, Zezheng Fang<sup>1,2</sup>, Yi Zhang<sup>1,2</sup>, Jianyu Shen<sup>1,2</sup>, Mingrui Wang<sup>1,2</sup>, Xu Han<sup>1,2</sup>, Huimin Geng<sup>1,2</sup>, Lei Sun<sup>7</sup>, Xingang Li<sup>1,8,9</sup>, Chen Chen<sup>3</sup>, Xinyi Jiang<sup>3</sup>, Shilei Ni<sup>1,2</sup>

<sup>1</sup>Department of Neurosurgery, Qilu Hospital, Cheeloo College of Medicine, Shandong University, 107 Wenhua Xi Road, Jinan, 250012, Shandong, China

<sup>2</sup>Institute of Brain and Brain-Inspired Science, Shandong University, 107 Wenhua Xi Road, Jinan, 250012, Shandong, China

<sup>3</sup>Key Laboratory of Chemical Biology (Ministry of Education), Department of Pharmaceutics, School of Pharmaceutical Sciences, Cheeloo College of Medicine, Shandong University, 44 Wenhua Xi Road, Jinan, 250012, Shandong, China

<sup>4</sup>Department of Pediatrics, Qilu hospital, Cheeloo College of Medicine, Shandong University, 107 Wenhua Xi Road, Jinan, 250012, Shandong, China

<sup>5</sup>Department of Obstetrics, The Second Hospital, Cheeloo College of Medicine, Shandong University, No. 247 Beiyuan Road, Jinan 250033, Shandong, China

<sup>6</sup>Department of Radiation Oncology, Qilu Hospital affiliated to Shandong University, 107 Wenhua Xi Road, Jinan, 250012, Shandong, China

<sup>7</sup>Department of Endocrinology, Qilu Hospital, Cheeloo College of Medicine, Shandong University, 107 Wenhua Xi Road, Jinan, Shandong 250012, China

<sup>8</sup>Jinan Microecological Biomedicine Shandong Laboratory, Jinan 250117, Shandong, China

<sup>9</sup>Shandong Key Laboratory of Brain Function Remodeling, Jinan 250117, Shandong, China

<sup>10</sup>These authors contributed equally: Yulin Zhang, Kaiyan Xi, Zhipeng Fu.

These authors jointly supervised this work: Chen Chen, Xinyi Jiang, Shilei Ni

Shilei Ni: nishilei@sdu.edu.cn

Xinyi Jiang: xinyijiang@sdu.edu.cn

Chen Chen: chenchen27@sdu.edu.cn

## Supplementary Methods

### Strain construction of VNP20009 $\Delta invA:sfgfp$

#### 1 *invA* knockout replacement repair homology arm construction

##### 1.1 Homology arm fragment and *sfgfp* gene amplification

The upstream and downstream homology arm sequences of *invA* were amplified using VNP20009 DNA as template with primers *invA*-19-F, *invA*-*sfgfp*-R, *invA*-*sfgfp*-F and *invA*-19-R. Amplification of *sfgfp* fragments with primers *sfgfp*-*invA*-F/R, using the *sfgfp* plasmid as a template (Supplementary Fig. 29).

Amplification system:

|                    |      |
|--------------------|------|
| 2×pfu PCR mix      | 25μl |
| Primer P1(10μM)    | 2μl  |
| Primer P2(10μM)    | 2μl  |
| Template           | 2μl  |
| ddH <sub>2</sub> O | 19μl |
| <hr/>              |      |
| Total              | 50μl |

Amplification condition: 94°C 5min 30Cycle (94°C 30sec, 55°C 30sec, 72°C 40sec)

##### 1.2 Seamless cloning

The three amplified fragments were seamlessly cloned according to the following system.

|                                                       |      |
|-------------------------------------------------------|------|
| 5×infusion cloning mix                                | 2μl  |
| Up-Recycled fragments                                 | 2μl  |
| Sfgfp-Recycled fragments                              | 2μl  |
| Down-Recycled fragments                               | 2μl  |
| puc19[ <i>Eco</i> RI- <i>Hind</i> III] linear carrier | 2μl  |
| <hr/>                                                 |      |
| Total                                                 | 10μl |

After mixing, leave on ice for 30min, transform *E. coli* DH5 $\alpha$  competent cells, spread Amp/IPTG/x-gal plate, and incubate at 37°C to pick the white fluorescent clone for sequencing. The sequenced clone was named *invA*(up-sfgfp-down)-puc19.

### 1.3 Repair homology arm amplification

The correctly sequenced *invA*(up-sfgfp-down)-puc19 plasmid was used as a template with primers *invA*-up-F/*invA*-down-R. The primers were used to amplify the repaired homology arm of the *invA* knockout substitution according to the following system.

|                                   |            |
|-----------------------------------|------------|
| 2 $\times$ superpfu PCR mix       | 25 $\mu$ l |
| <i>invA</i> -up-F(10 $\mu$ M)     | 2 $\mu$ l  |
| <i>invA</i> -down-R(10 $\mu$ M)   | 2 $\mu$ l  |
| <i>invA</i> (up-sfgfp-down)-puc19 | 1 $\mu$ l  |
| ddH <sub>2</sub> O                | 20 $\mu$ l |
| <hr/>                             |            |
| Total                             | 50 $\mu$ l |

Amplification conditions: 94°C 5min 32Cycle (94°C 30sec, 55°C 30sec, 68°C 40sec)  
10°C hold on

## 2 CRISPR/Cas9 *invA* knockout replacement strain screening

### 2.1 Preparation of VNP20009 competent cells

- 1) Activated culture of VNP20009 at 37°C;
- 2) Inoculate the monoclonal to 5ml LB liquid medium;
- 3) The next day it was transferred to 50 ml LB liquid medium and centrifuged to collect the bacteria at an OD growth rate of about 0.8;
- 4) The bacteria were washed three times with 10% glycerol and finally resuspended with 2ml 10% glycerol as the prepared competent cells.

### 2.2 Electrotransformation of plasmids containing pCas9

Add 10 $\mu$ l of plasmid to the prepared competent cells and place them on ice for 5min, electrotransform them at 2500V, add 1ml of LB medium, and incubate them at 37°C for 1h before spreading the Kan-resistant plate.

### 2.3 Transformation of sgRNA and repair of homology arms

Recovered *invA-sfgfp* repair homology arm and prepared sgRNA plasmid were electrotransformed into prepared Cas9 VNP20009 competent cells, and Kan/Tc plates were coated to screen for integrating strains.

### 2.4 Gene identification of VNP20009 $\Delta invA:sfgfp$

The primers *invA-up-F/invA-down-R* and *invA-ter-F/R* were used to identify wild bacteria and integrating bacteria (Supplementary Fig. 30). After identification, the tool plasmid was eliminated to obtain VNP20009  $\Delta invA:sfgfp$ . The editing bacteria containing Cas9 plasmid were also saved for use in the next editing step.

### **Strain construction of VNP20009 $\Delta invA:sfgfp glms:FNR-invA$**

#### 1 *FNR-invA* insertion repair homology arm construction

##### 1.1 Amplification of insertion site homology arms and insertion gene fragments

The upstream and downstream homology arms of *glms* were amplified with primers *glms-19-F/glms-FNR-R* and *glms down-invA-F/glms-19-R*, respectively, using VNP20009 DNA as a template. The *FNR* promoter sequence was amplified using the *FNR* promoter vector, and the *invA* gene fragment for insertion was amplified using *invA-FNR-F/invA-his-R* (Supplementary Fig. 31).

Amplification system:

|                    |      |
|--------------------|------|
| 2×pfu PCR mix      | 25μl |
| Primer P1(10μM)    | 2μl  |
| Primer P2(10μM)    | 2μl  |
| Template           | 2μl  |
| ddH <sub>2</sub> O | 19μl |
| <hr/>              |      |
| Total              | 50μl |

Amplification conditions: 94°C 5min 30Cycle (94°C 30sec, 55°C 30sec, 72°C 40sec)  
10°C hold on

## 1.2 Seamless clonal joining of homologous arm fragments and insertion genes

The amplified fragments were purified from PCR products and then seamlessly clonally ligated according to the following system conditions.

|                                              |      |
|----------------------------------------------|------|
| 5×infusion cloning mix                       | 2μl  |
| Up-Recycled fragments                        | 2μl  |
| invA-Recycled fragments                      | 2μl  |
| FNR-Recycled fragments                       | 1μl  |
| down-Recycled fragments                      | 2μl  |
| puc19[ <i>EcoRI-HindIII</i> ] linear carrier | 1μl  |
| <hr/>                                        |      |
| Total                                        | 10μl |

After mixing and placing on ice for 30 min, *E. coli* DH5α competent cells were transformed and cultured on Amp/IPTG/x-gal coated plates, followed by picking white single clones for sequencing. The correctly sequenced clone was named glms-Up-FNR-invA-down-pUC19.

## 1.3 Preparation of repair homology arms for *FNR-invA* insertion

Repair of homology arm fragments by amplification with primers glms-up-F/glms-down-R using the correctly sequenced glms-Up-FNR-invA-down-pUC19 plasmid as a template.

## 2 CRISPR/Cas9 *invA* insertion strain screening

2.1 Preparation of VNP20009  $\Delta invA:sfgfp$  pCas9 competent cells as described above.

### 2.2 Transformation of sgRNA and repair of homology arms

Recovered *glms-FNR-invA* repair homology arm and prepared glms sgRNA plasmid were added to prepared VNP20009  $\Delta invA:sfgfp$  pCas9 competent cells, placed on ice for 5 min, transformed by 2500V. The integrated strains were screened using coated Kan/Tc plates after adding 1 ml of LB medium and shaking the culture for 1h.

### 2.3 Gene identification of VNP20009 $\Delta invA:sfgfp$ *glms:FNR-invA*

The primers *glms-up-F*/*glms-down-R* were used to identify wild bacteria and integrating bacteria (Supplementary Fig. 32). After identification, the tool plasmid was eliminated to obtain VNP20009  $\Delta invA:sfgfp$  *glms:FNR-invA*.

### Construction of *LysE* gene expression vector and transformation screening

#### 1 Seamless cloning

The *LysE* fragment amplification product and the pBAD plasmid linearisation digest product were seamlessly clonally ligated according to the following system conditions.

|                                             |      |
|---------------------------------------------|------|
| 5×infusion cloing mix                       | 2μl  |
| LysE Recycled fragments                     | 6μl  |
| pBAD <i>EcoRI</i> digested vector fragments | 2μl  |
| <hr/>                                       |      |
| Total                                       | 10μl |

After mixing and placing on ice for 30 min, *E. coli* DH5α competent cells were transformed and incubated on Amp plates at 37°C to pick monoclonal identification.

#### 2 PCR identification

Pick the monoclonal to 10 μl of aseptic water and mix well, then take 0.5 μl as a template, according to the following system for identification. Then positive clonal plasmids were picked and sent for sequencing, and the correctly sequenced plasmid was named *pBAD-LysE*.

|                    |       |
|--------------------|-------|
| 2×Taq PCR mix      | 10μl  |
| pBAD-F(10μM)       | 0.5μl |
| pBAD-R(10μM)       | 0.5μl |
| bacterial solution | 0.5μl |
| ddH <sub>2</sub> O | 8.5μl |
| <hr/>              |       |
| Total              | 20μl  |

Amplification conditions: 94°C 5min 30Cycle (94°C 30sec, 55°C 30sec, 72°C 1min)  
10°C hold on.

### 3 Electrotransformation of *pBAD-LysE*

Preparation of VNP20009  $\Delta invA:sfgfp glms:FNR-invA$  competent cells as described above. Take 1  $\mu$ l of plasmid and add it to the prepared competent cells and place it on ice for 5min, electrotransform it at 2500V, add 1ml of LB medium, recover the culture at 37°C for 1h and then spread the Amp resistance plate.

### 4 Gene identification of VNP20009 $\Delta invA:sfgfp glms:FNR-invA pBAD-LysE$

The primers pBAD-F/pBAD-R were used to identify wild bacteria and integrating bacteria. Positive clones were sent for sequencing and the final positive clone identified was VNP20009  $\Delta invA:sfgfp glms:FNR-invA pBAD-LysE$  (Supplementary Fig. 33).

The primer sequences involved above are shown in Supplementary Table 3.



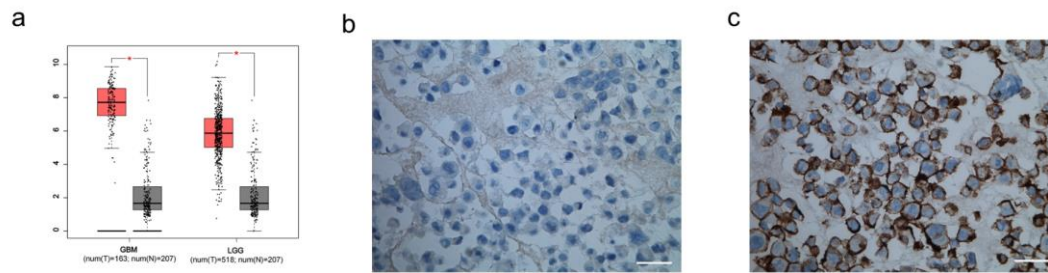

Supplementary Figure 1. (a) mRNA expression levels of CD44 in GBM and low-grade glioma (LGG) analyzed by GEPIA database. The statistical comparisons were performed with the one-way analysis of variance (ANOVA) with Tukey's post hoc test. (b) Immunohistochemical staining showing the expression levels of CD44 in NHA cells. ( $n = 3$  independent experiments). (c) Immunohistochemical staining showing the expression levels of CD44 in QL01# GBM cells. ( $n = 3$  independent experiments). The scale bar is 10  $\mu\text{m}$ .

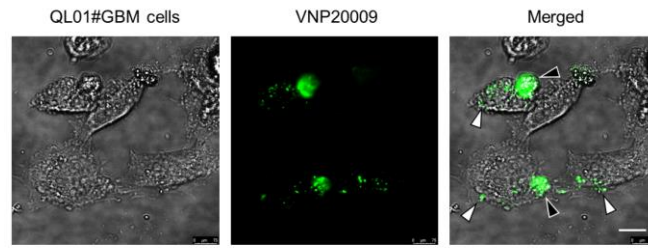

Supplementary Figure 2. Formation of SCVs (black arrows) inside GBM cells after SDV invasion. ( $n = 3$  independent experiments). The scale bar is 10  $\mu\text{m}$ .

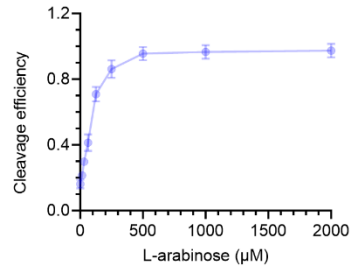

Supplementary Figure 3. Efficiency curves demonstrating SDV cleavage at various L-arabinose concentrations. ( $n = 6$  independent experiments). Data are presented as the mean  $\pm$  S.D. Source data are provided as a Source Data file.

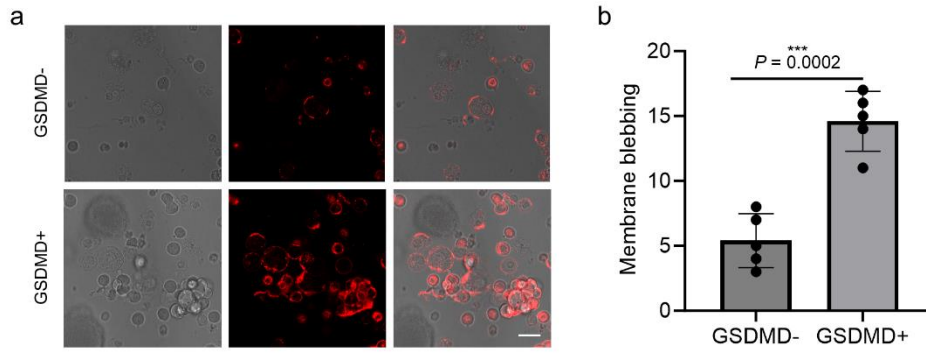

Supplementary Figure 4. Fluorescence staining (a) and statistical analysis (b) of cell membrane vacuole formation in GSDMD high versus low expressing QL01#GBM cells. ( $n = 5$  independent experiments). The scale bar is  $10 \mu\text{m}$ . The statistical comparisons in (b) were performed with two-tailed, unpaired Student's  $t$  tests, with asterisks indicating significant differences. Source data are provided as a Source Data file.

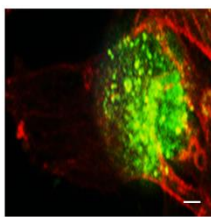

Supplementary Figure 5. Formation of SCVs after IASNDS treatment in QL01#GBM cells. ( $n = 3$  independent experiments). The scale bar is 1  $\mu\text{m}$ .

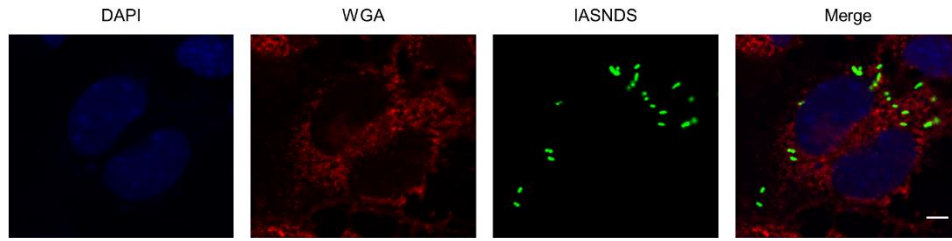

Supplementary Figure 6. Bacterial invasion into QL01#GBM cells after 2 hours of IASNDS treatment (green), with no SCV formation. ( $n = 3$  independent experiments). The scale bar is 1  $\mu\text{m}$ .

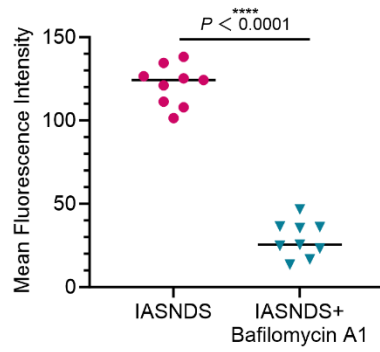

Supplementary Figure 7. Mean fluorescence intensity of QL01#GBM cells after IASNDS-induced autolysis following Bafilomycin A1 inhibition of lysosomal function. ( $n = 9$  images from three independent experiments). The statistical comparisons were performed with two-tailed, unpaired Student's  $t$  tests, with asterisks indicating significant differences. (exact  $P$  value:  $P = 1.0382E-11$ ); \*\*\*\* $P < 0.0001$ . Source data are provided as a Source Data file.

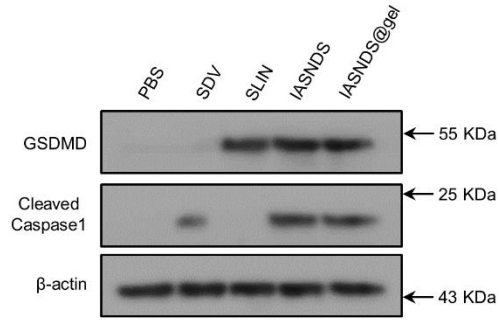

Supplementary Figure 8. Western blot confirming increased cellular GSDMD expression in the SLIN treatment group, along with enhanced cleaved caspase 1 expression due to the SDV component. ( $n = 3$  independent experiments).



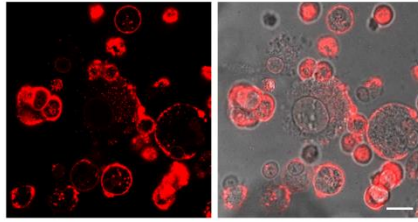

Supplementary Figure 9. Confocal microscopy images showing cellular pyroptosis after 24 hours of IASNDS treatment (Red Membrane) in QL01#GBM cells. ( $n = 3$  independent experiments). The scale bar is 5  $\mu\text{m}$ .

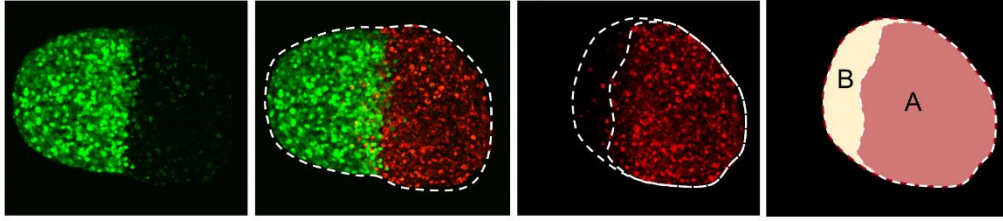

Supplementary Figure 10. Statistical analysis approach for the 3D invasion experiment, with calculation of the invasion rate.

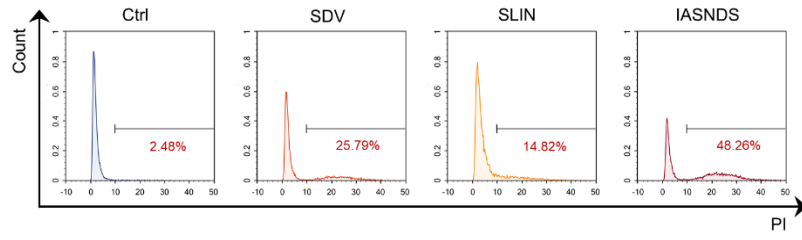

Supplementary Figure 11. Flow cytometry analysis of QL01#GBM cell staining under different treatment conditions (PI). ( $n = 6$  independent experiments).

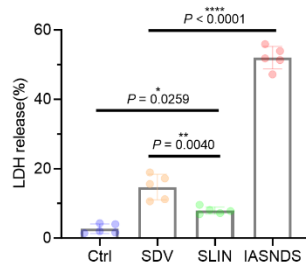

Supplementary Figure 12. LDH release analysis after 24 hours of PBS, SDV, SLIN, and IASNDS treatment in QL01#GBM cells. ( $n = 5$  independent experiments). Data are presented as the mean  $\pm$  S.D. Statistical comparisons were performed using one-way ANOVA with Tukey's post hoc test, with asterisks indicating significant differences (\* $P < 0.05$ , \*\* $P < 0.01$ , \*\*\* $P < 0.001$ , \*\*\*\* $P < 0.0001$ ). (exact  $P$  value:  $P = 9.89E-13$ ). Source data are provided as a Source Data file.

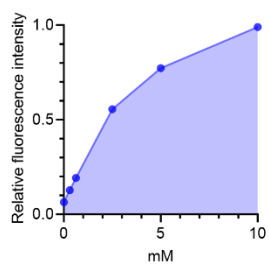

Supplementary Figure 13. Cumulative release of Cy5-modified CpG ODN at different ATP concentrations. ( $n = 3$  independent experiments). Data are presented as the mean  $\pm$  S.D. Source data are provided as a Source Data file.

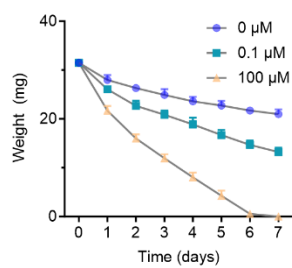

Supplementary Figure 14. Changes in gel weight after co-incubation of artificial cerebrospinal fluid with different concentrations of ATP and 30  $\mu\text{L}$  of hydrogel for different periods of time. ( $n = 5$  independent experiments). Source data are provided as a Source Data file.

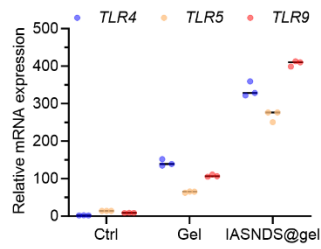

Supplementary Figure 15. The change in cellular expression of TLRs after 24 hours of coincubation of THP-1 macrophages with a hydrogel containing CpG ODN (Gel, IASNDS@gel). Data are presented as the mean  $\pm$  S.D. ( $n = 3$  independent experiments). Source data are provided as a Source Data file.

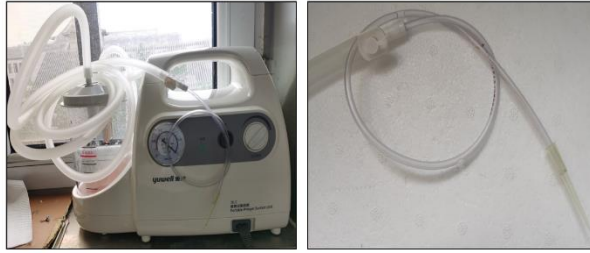

Supplementary Figure 16. Suction device for mouse GBM resection, simulating clinical surgical suctioning with specified parameters.



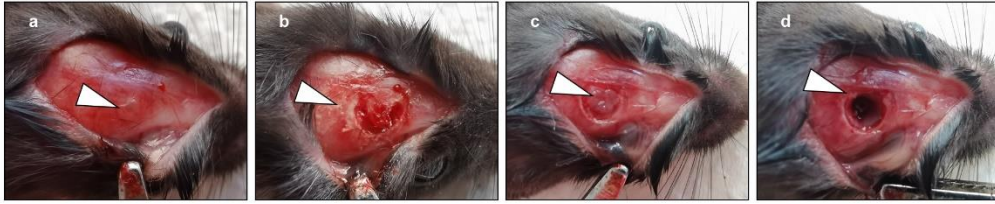

Supplementary Figure 17. Photographs illustrating the process of GBM resection with a combination of surgery and a suction device, white arrow shows tumor cavity.

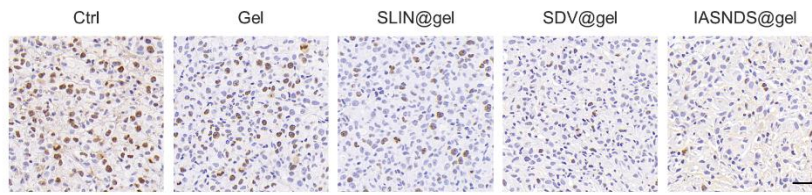

Supplementary Figure 18. Ki-67 immunohistochemical staining of tumor tissues in different groups. Representative images of the independent biological samples. ( $n = 3$  independent biological samples). The scale bar is 10  $\mu\text{m}$ .

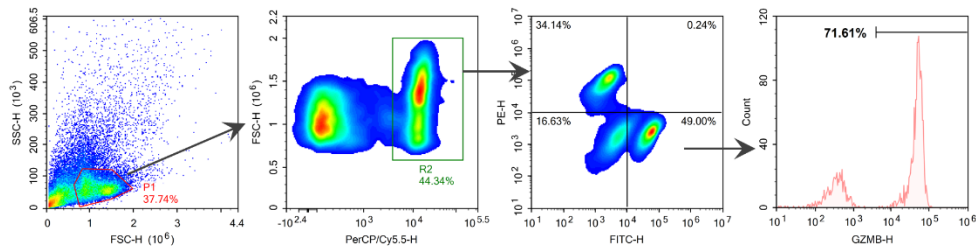

Supplementary Figure 19. Gating strategy for T-cell analysis. On day 20 post-treatment, groups of mice were humanely euthanized. Brain tissue samples were carefully collected and processed into cell suspensions using a glass grinder. Following the subsequent centrifugation and filtration steps, individual cells were quantified for flow cytometry analysis of T lymphocytes. A total of 1,000,000 cellular events was acquired for each sample during the analysis. Relevant cells were identified based on their locations within the FSC/SSC plot, which took into account their size. The total number of T cells was then determined by focusing on  $CD3^+$  cell counts. Furthermore, within the population of  $CD3^+$  T lymphocytes, a subset consisting of  $CD4^+$  and  $CD8^+$  T cells was carefully identified, as shown in Figure 7b. In the final step, a thorough analysis was conducted to identify granzyme B-positive T lymphocytes within the  $CD8^+$  T lymphocytes, as shown in Figure 7e.

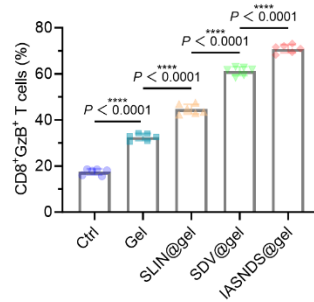

Supplementary Figure 20. Statistical analysis of CD3<sup>+</sup>CD8<sup>+</sup>Granzyme B<sup>+</sup> T cells in GBM tissues under various treatment conditions. ( $n = 6$  independent experiments). Data are presented as the mean  $\pm$  S.D. Statistical comparisons were performed using one-way ANOVA with Tukey's post hoc test, with asterisks indicating significant differences. (exact  $P$  values: Ctrl vs. Gel  $P = 6.32E-13$ , Gel vs. SLIN@gel  $P = 8.0463E-11$ , SLIN@gel vs. SDV@gel  $P = 1.14E-13$ , SDV@gel vs. IASNDS@gel  $P = 7.48308E-09$ ); \*\*\*\* $P < 0.0001$ . Source data are provided as a Source Data file.

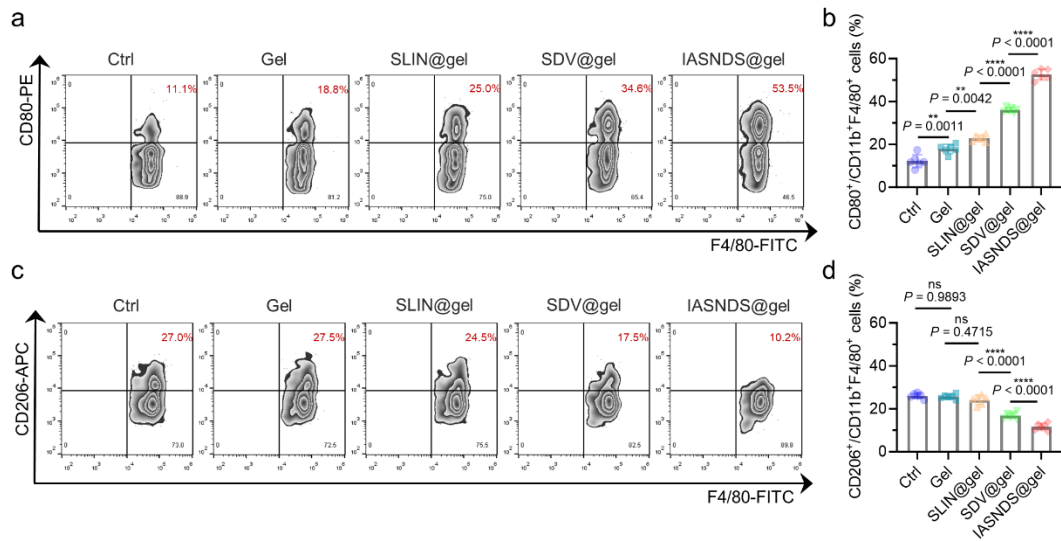

Supplementary Figure 21. Flow cytometric results (a) and analysis of statistical differences (b) in intra-tumoral M1 macrophage cells in mice after treatment of in situ hormonal mice with different drugs. ( $n = 6$  independent experiments). Flow cytometric results (c) and analysis of statistical differences (d) in intra-tumoral M2 macrophage cells in mice after treatment of in situ hormonal mice with different drugs. ( $n = 6$  independent experiments). Statistical comparisons were performed using one-way ANOVA with Tukey's post hoc test, with asterisks indicating significant differences (ns = no significance,  $*P < 0.05$ ,  $**P < 0.01$ ,  $***P < 0.001$ ,  $****P < 0.0001$ ). (exact  $P$  values of b: SLIN@gel vs. SDV@gel  $P = 1.18872E-09$ , SDV@gel vs. IASNDS@gel  $P = 1.0138E-11$ ; exact  $P$  values of d: SLIN@gel vs. SDV@gel  $P = 2.20199E-07$ , SDV@gel vs. IASNDS@gel  $P = 8.00699E-05$ ). Source data are provided as a Source Data file.

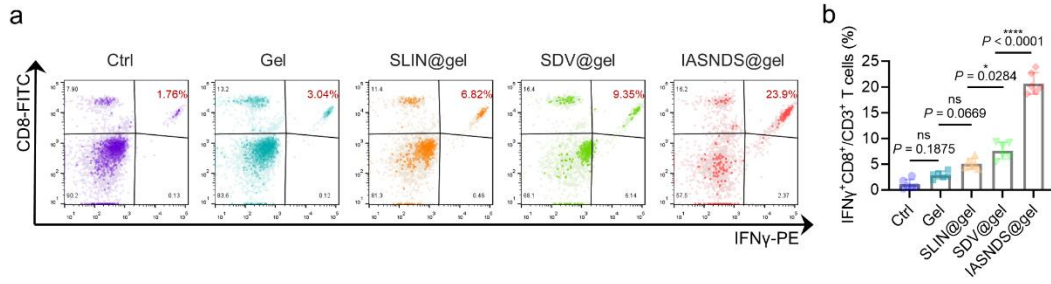

Supplementary Figure 22. (a) Flow cytometric analysis of CD8<sup>+</sup>IFN $\gamma$ <sup>+</sup> cells in different treatment groups of mice and analysis of statistical results (b). ( $n = 6$  independent experiments). Statistical comparisons were performed using one-way ANOVA with Tukey's post hoc test, with asterisks indicating significant differences (ns = no significance,  $*P < 0.05$ ,  $****P < 0.0001$ ). (exact  $P$  value: SDV@gel vs. IASNDS@gel  $P = 8.7E-14$ ). Source data are provided as a Source Data file.

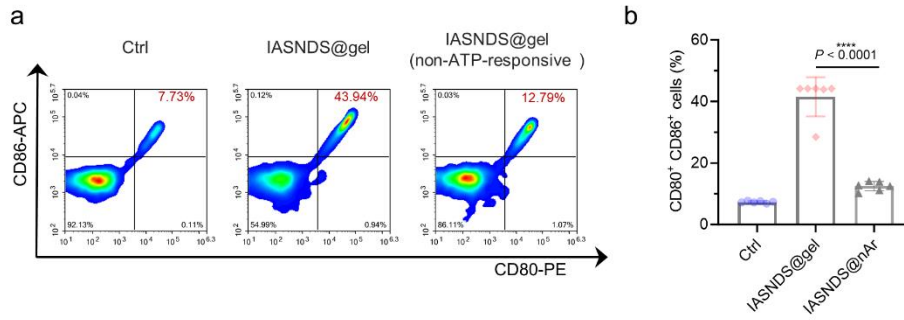

Supplementary Figure 23. (a) Flow cytometric analysis of APCs within ATP-responsive and non-responsive gels. (b) Shows statistical differences in CD80<sup>+</sup>CD86<sup>+</sup> cells. ( $n = 6$  independent experiments). (exact  $P$  value: IASNDS@gel vs. IASNDS@nAr  $P = 3.20917E-09$ ); \*\*\*\* $P < 0.0001$ . Source data are provided as a Source Data file.

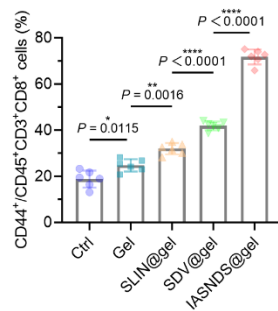

Supplementary Figure 24. Differences of immune memory cells in tumor tissues of mice in different treatment groups. ( $n=6$  independent experiments). Statistical comparisons were performed using one-way ANOVA with Tukey's post hoc test, with asterisks indicating significant differences ( $*P < 0.05$ ,  $**P < 0.01$ ,  $****P < 0.0001$ ). (exact  $P$  values: SLIN@gel vs. SDV@gel  $P = 2.5305E-05$ , SDV@gel vs. IASNDS@gel  $P = 3.6E-14$ ). Source data are provided as a Source Data file.



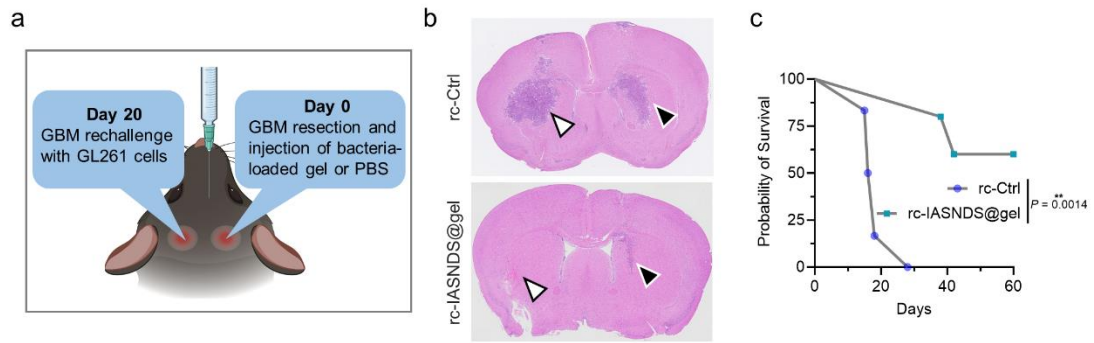

Supplementary Figure 25. Rechallenge the experiment. (a) Diagram of the experimental design model. (b) H&E staining of mouse brain tissue sections. ( $n = 3$  independent biological samples). (c) Kaplan-Meier survival analysis of rechallenged mice. ( $n = 6$  independent biological samples). Data analysis was performed employing the log-rank (Mantel–Cox) test. Source data are provided as a Source Data file.

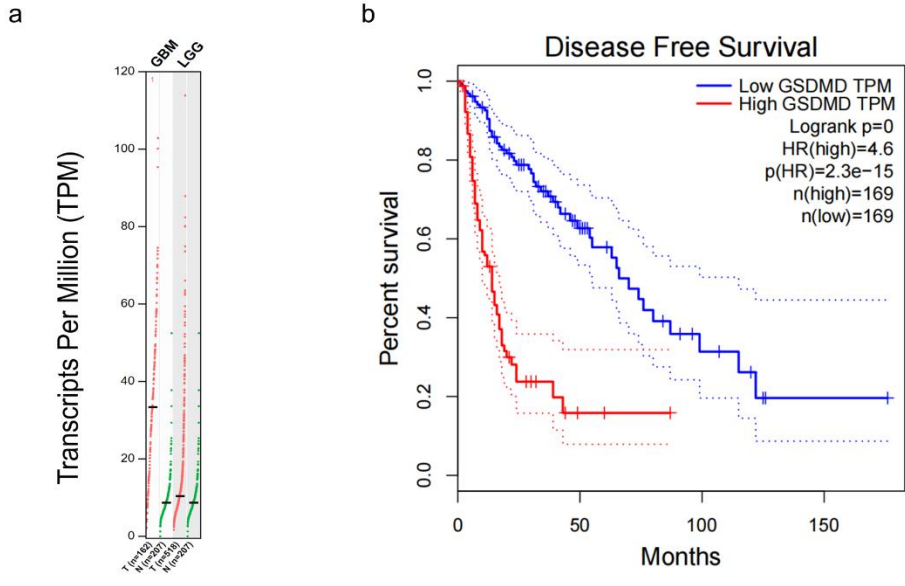

Supplementary Figure 26. (a) GEPIA database analysis of *GSDMD* mRNA differences between GBM and LGG. (b) Difference in survival time analyzed between patients with high and ground expression of *GSDMD*.

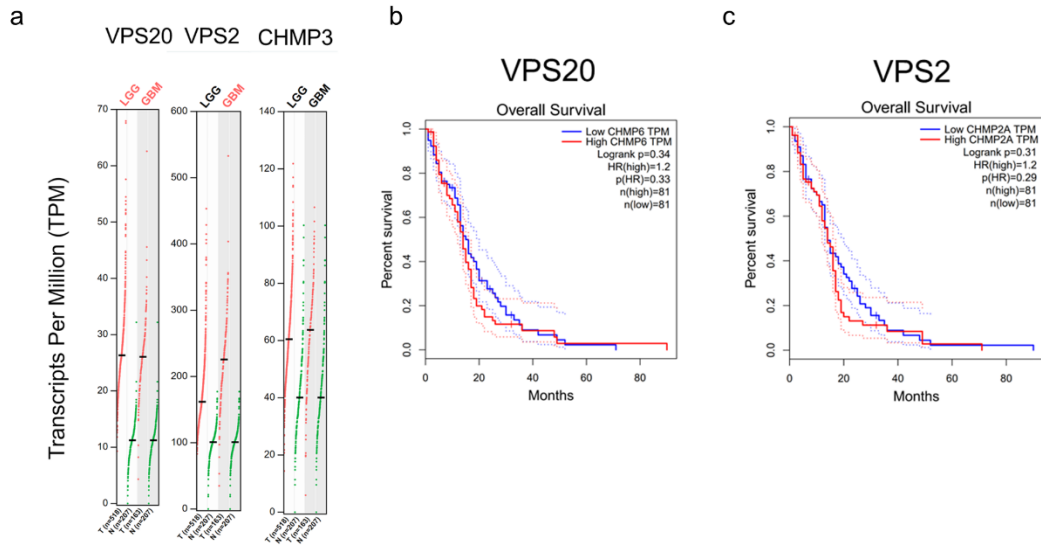

Supplementary Figure 27. (a) We analyzed the expression of ESCRT-III complex-related genes (*VPS20*, *VPS2*, *CHMP3*) in tumor samples from GBM and LGG patients. (b) Difference between *VPS20* expression and patient prognosis. (c) Difference between *VPS2* expression and patient prognosis.

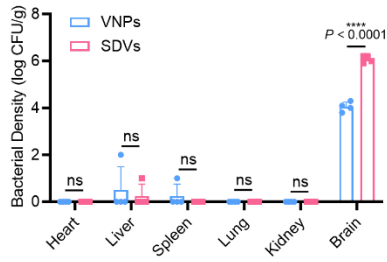

Supplementary Figure 28. Tail vein injection of VNP20009 and SDVs for 2 hours was followed by extraction and bacterial culture of mouse heart, liver, spleen, lung, kidney and brain tissue suspensions. ( $n = 4$  independent experiments). The statistical comparisons were performed with two-tailed, unpaired Student's  $t$  tests. (exact  $P$  value: SDVs vs. VNPs  $P = 4.09991E-06$ ); \*\*\*\* $P < 0.0001$ . Source data are provided as a Source Data file.

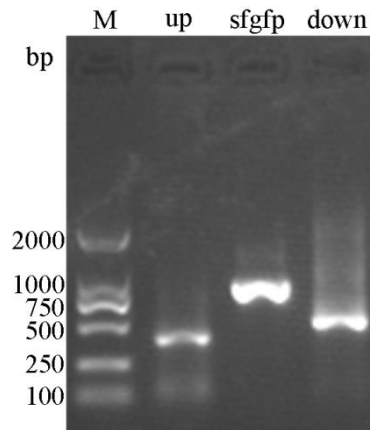

Supplementary Figure 29. Agarose gel electrophoresis assay of *invA*-up-*sfgfp*-down amplification. ( $n = 3$  independent experiments). M refers to DL2000 DNA marker, up refers to the amplified upstream homology arm fragment, *sfgfp* is the amplified *sfgfp* fragment with promoter, and down refers to the amplified downstream homology arm fragment.

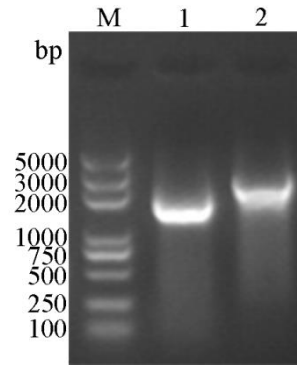

Supplementary Figure 30. Agarose gel electrophoresis assay of identification of wild bacteria and integrating bacteria. ( $n = 3$  independent experiments). 1 refers to the amplification product of VNP20009  $\Delta invA:sfgfp$ . 2 refers to the amplification product of the original VNP20009, and the 1 product was sent for sequencing.

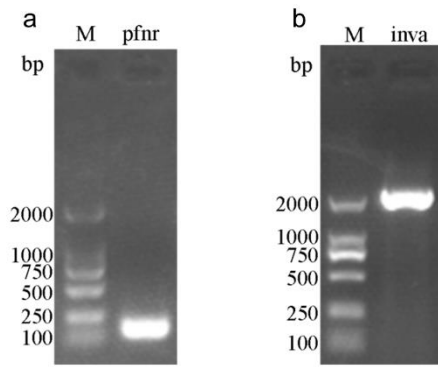

Supplementary Figure 31. Agarose gel electrophoresis detection of *FNR* promoter fragment (a) and *invA* gene amplification (b). ( $n = 3$  independent experiments).

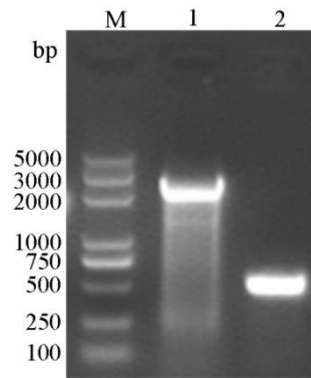

Supplementary Figure 32. Agarose gel electrophoresis assay of identification of FNR-*invA* integration. ( $n = 3$  independent experiments). 1 refers to VNP20009  $\Delta invA:sfgfp$  *glms:FNR-invA* amplification product. 2 refers to VNP20009 original bacterial amplification product.



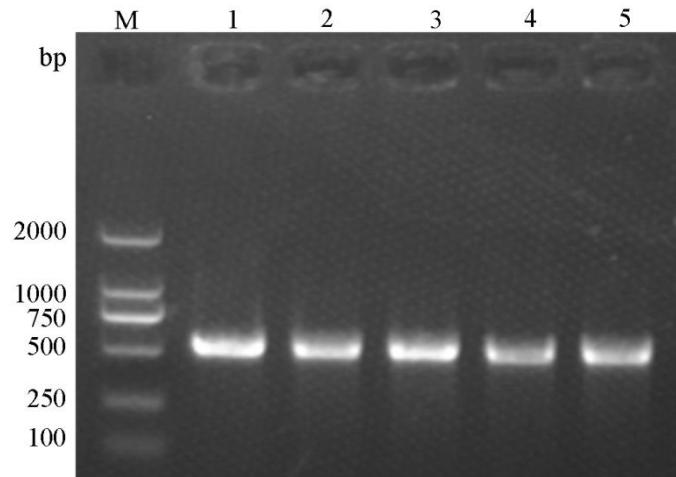

Supplementary Figure 33. PCR identification of colonies of VNP20009  $\Delta invA:sfgfp$  *glms:FNR-invA pBAD-LysE*. ( $n = 3$  independent experiments). 1-5 were randomly picked clone numbers

| Time (Day) | Ctrl (CFU/mL) |     | IASNDS@gel (CFU/mL) |     |
|------------|---------------|-----|---------------------|-----|
|            | Blood         | CSF | Blood               | CSF |
| 1          | 0             | 0   | 0                   | 1   |
| 3          | 0             | 0   | 0                   | 0   |
| 5          | 0             | 0   | 0                   | 0.5 |
| 7          | 0             | 0   | 0                   | 0   |
| 9          | 0             | 0   | 0                   | 0   |

Supplementary Table 1. Bacterial culture of cerebrospinal fluid and blood at different time points after local injection of IASNDS@gel in the operative cavity and counting of colonies ( $n = 5$  independent experiments).

Supplementary Table 2.

|                                        |                                              |
|----------------------------------------|----------------------------------------------|
| ATP Aptamer-NH <sub>2</sub> (5' to 3') | NH <sub>2</sub> -ACCTGGGGGAGTATTGCGGAGGAAGGT |
| ATP Aptamer-BHQ3                       | ACCTGGGGGAGTATTGCGGAGGAAGGT-BHQ3             |
| CpG-cApt                               | TCGTCGTTTTCGGCGCGCGCCGACCTTCCTCCGCAA         |
| CpG-cApt-Cy5                           | Cy5-<br>TCGTCGTTTTCGGCGCGCGCCGACCTTCCTCCGCAA |
| CpG-cApt-Cy5.5                         | Cy5.5-ACCTTCCTCCGCAA                         |

Supplementary Table 3.

|                  |                                                 |
|------------------|-------------------------------------------------|
| invA-up-F        | TTCAGCGATATCCAAATGTTGCA                         |
| invA-sfgfp-R     | CCGATGATTAATTGTCAAGCGAATTACGAGCAGT<br>AATGGT    |
| invA-sfgfp-F     | GATGAGCTCTACAAATAGATCCTGTTAATATTA<br>ATTAAG     |
| invA-down-R      | GATATTGACGCGAATGACGCCAG                         |
| sfgfp-invA-F     | ACTGCTCGTAATTCGCTTGACAATTAATCATCGG<br>CTCGTA    |
| sfgfp-invA-R     | ATTTAATATTAACAGGATCTATTTGTAGAGCTCAT<br>CCATG    |
| invA-19-F        | TGTAAAACGACGGCCAGTTTCAGCGATATCCAAA<br>TGTTGCA   |
| invA-19-R        | CTATGACCATGATTACGCCGATATTGACGCGAAT<br>GACGCCAG  |
| invA-ter-F       | GCTCCACGAATATGCTCCACAAG                         |
| invA-ter-R       | TAACAGTGCTCGTTTACGACCTG                         |
| glms-19-F        | TGTAAAACGACGGCCAGTCGCGGAACAACACTGGTC<br>AGGGAAA |
| glms-19-R        | CTATGACCATGATTACGCCAAGCATCACGCGCTA<br>TTCCTGG   |
| glms-FNR-R       | AAACTTTGCGGCGTTTTTGTACAAATGTAGTACC<br>AGGCAG    |
| invA-FNR-F       | AAGGAGATATACATATGGTGCTGCTTCTCTACTT<br>AACAG     |
| invA-his-R       | GTGGTGGTGGTGGTGGTGTATTGTTTTTATAACAT<br>TCACT    |
| glms down-invA-F | CACCACCACCACCACCACTAATTACTCTACGGTA<br>ACCGATTC  |
| glms-up-F        | CGCGGAACAACACTGGTCAGGGAAA                       |
| glms-down-R      | TCTTCGCCGATCAGGATGCGGGT                         |
| pBAD-F           | TAATCACGGCAGAAAAGTCCA                           |
| pBAD-R           | AATCTTCTCTCATCCGCCAAA                           |
